1 **Metagenomic shotgun analyses reveal complex patterns of**  
2 **intra- and interspecific variation in the intestinal**  
3 **microbiomes of codfishes**

4  
5

6 **Even Sannes Riiser<sup>1\*</sup>, Thomas H.A. Haverkamp<sup>1,2</sup>, Srinidhi Varadharajan<sup>1</sup>,**  
7 **Ørnulf Borgan<sup>3</sup>, Kjetill S. Jakobsen<sup>1</sup>, Sissel Jentoft<sup>1</sup> and Bastiaan Star<sup>1\*</sup>**

8

9 <sup>1</sup>Centre for Ecological and Evolutionary Synthesis, Department of Biosciences,  
10 University of Oslo, PO Box 1066, Blindern, N-0316 Oslo, Norway.

11

12 <sup>2</sup>Present Address: Department of Epidemiology, Norwegian Veterinary Institute,  
13 Oslo, Norway

14

15 <sup>3</sup>Department of Mathematics, University of Oslo, PO Box 1053, Blindern, N-  
16 0316 Oslo, Norway.

17

18

19 **\* Correspondence**

20 Even Sannes Riiser\*: [e.s.riiser@ibv.uio.no](mailto:e.s.riiser@ibv.uio.no)

21 Bastiaan Star\*: [bastiaan.star@ibv.uio.no](mailto:bastiaan.star@ibv.uio.no)

22

23

24

24 **Abstract**

25

25 The relative importance of host-specific selection or environmental factors in  
26 determining the composition of the intestinal microbiome in wild vertebrates

26

27 remains poorly understood. Here, we use metagenomic shotgun sequencing of  
28 individual specimens to compare the intra- and interspecific variation of

28

29 intestinal microbiome communities in two ecotypes (NEAC and NCC) of  
30 Atlantic cod (*Gadus morhua*) –that have distinct behavior and habitats– and

30

31 three *Gadidae* species that occupy a range of ecological niches. Interestingly, we  
32 find significantly diverged microbiomes amongst the two Atlantic cod ecotypes.

32

33 Interspecific patterns of variation are more variable, with significantly diverged  
34 communities for most species' comparisons, apart from the comparison between

34

35 coastal cod (NCC) and Norway pout (*Trisopterus esmarkii*), whose community

36 compositions are not significantly diverged. The absence of consistent species-  
37 specific microbiomes suggests that external environmental factors, such as  
38 temperature, diet or a combination thereof comprise major drivers of the  
39 intestinal community composition of codfishes.

40

## 41 **Importance**

42 The composition of the intestinal microbial community associated with teleost  
43 fish is influenced by a diversity of factors, ranging from internal factors (such as  
44 host-specific selection) to external factors (such as niche occupation). These  
45 factors are often difficult to separate, as differences in niche occupation (e.g.  
46 diet, temperature or salinity) may correlate with distinct evolutionary  
47 trajectories. Here, we investigate four gadoid species with contrasting levels of  
48 evolutionary separation and niche occupation. Using metagenomic shotgun  
49 sequencing, we observe distinct microbiomes amongst two Atlantic cod (*Gadus*  
50 *morhua*) ecotypes (NEAC and NCC) with distinct behavior and habitats. In  
51 contrast, interspecific patterns of variation are more variable. For instance, we  
52 do not observe interspecific differentiation between the microbiomes of coastal  
53 cod (NCC) and Norway pout (*Trisopterus esmarkii*) whose lineages have  
54 evolutionary separated over 20 million years ago. The observed pattern of  
55 microbiome variation in these gadoid species is therefore most parsimoniously  
56 explained by differences in niche occupation.

57

## 58 **1. Introduction**

59 Significant research effort has focused on the importance of external,  
60 environmental factors (e.g. habitat, geography, microbial biodiversity, diet,  
61 water temperature or salinity) and internal, host-related factors (e.g. genetics,  
62 physiology or immunity) in driving the composition of the intestinal  
63 microbiome in fish (1, 2). That external factors play an important role is well

64 established. For instance, bacterial diversity in the surrounding water influences  
65 the intestinal microbiome in fish larvae and fry (3, 4), water temperature is the  
66 main driver for the gut microbiome composition in farmed Tasmanian Atlantic  
67 salmon (*Salmo salar*) (5) and diet influences the intestinal composition in both  
68 experimental (6–9) as well as wild fish populations (10–13). Yet also internal  
69 factors influence the composition of these bacterial communities. For instance,  
70 observations of a shared (core) microbiome between wild and laboratory-raised  
71 zebrafish suggest that distinct selective pressures determine the composition of  
72 the microbial communities (14). Moreover, an association between host  
73 phylogeny and intestinal microbiome composition has been observed for a range  
74 of fishes, marine animals and terrestrial mammals (15–19).

75  
76 The adaptive immune system appears especially important for host selection;  
77 individual variation of the Major Histocompatibility Complex (MHC) II  
78 correlates with the gut microbiome composition in stickleback (20); mucosal  
79 IgT depletion causes dysbiosis in rainbow trout (*Oncorhynchus mykiss*) (21),  
80 and lack of a functional adaptive immune system reduces the strength of host  
81 selection in knockout zebrafish models (22). Amongst bony fish, gadoid fishes  
82 have an unusual adaptive immune system –through the loss of MHC II, CD4  
83 and invariant chain (Ii) and a range of innate (TLR) and MHC I immune-gene  
84 expansions (23, 24). Moreover, Atlantic cod has high levels of IgM (25) and a  
85 minimal antibody response after pathogen exposure (25–27). Gadoids therefore  
86 provide an interesting ecological system to study host-microbiome interactions  
87 (28).

88  
89 Studies that specifically integrate internal and external influence support a role  
90 for both factors driving the microbial community composition (13, 29). Such  
91 studies however, remain restricted in both level of taxonomy of fishes (e.g. (30))  
92 as well as taxonomical resolution of the microbial analyses (16S rRNA: 13, 29,

93 31–33). Importantly, it remains often difficult to separate the correlated effects  
94 of distinct behavior (i.e. diet) and niche occupation with interspecific selection  
95 and no comparative studies exist that use metagenomic shotgun sequencing to  
96 investigate fish populations with profound differences in behavior within a  
97 single species. It remains therefore unclear, whether the microbial composition  
98 for a range of wild fish species is characterized by intra- or interspecific  
99 divergence.

100

101 Here, we study intra- and interspecific divergence of intestinal microbial  
102 communities within the wide-spread family of *Gadidae* using a metagenomic  
103 shotgun dataset. We compare the microbiomes from Norway pout (*Trisopterus*  
104 *esmarkii*), poor cod (*Trisopterus minutus*), northern silvery pout (*Gadiculus*  
105 *thori*) and two ecotypes of Atlantic cod (*Gadus morhua*). These four species  
106 have overlapping geographical distributions, are dietary generalists, usually  
107 feeding over sandy and muddy bottoms on pelagic or benthic crustaceans,  
108 polychaetas and (small) fish (34, 35) and have evolutionary diverged  
109 approximately 20 million years ago (24). Norway pout is benthopelagic,  
110 distributed from the English Channel, around Iceland, and up to the Southwest  
111 Barents Sea, mostly found between 100 – 200 meters depth. Poor cod is also  
112 benthopelagic, distributed from the Trondheim Fjord in Norway to the  
113 Mediterranean Ocean, mostly found between 15 – 200 meters. Northern silvery  
114 pout (*Gadiculus thori*) is meso- to bathypelagic (36), distributed in the North  
115 Atlantic Ocean, along the coast of Norway and around Iceland and Greenland. It  
116 forms large schools, and are usually found between 200 – 400 meters (34, 36,  
117 37). Finally, Atlantic cod has a trans-Atlantic distribution, from the Bay of  
118 Biscay to the Barents Sea, the Baltic Sea, around Iceland and Greenland, in the  
119 Hudson Bay and along the North American coast (34, 38–42). Atlantic cod  
120 comprises various subpopulations and “ecotypes” with distinct adaptations,  
121 migratory and feeding behavior. For instance, northeast Arctic cod (NEAC)

122 performs typical spawning migrations from the Barents Sea to the Norwegian  
123 coast whereas the Norwegian coastal cod (NCC) remains more stationary (34,  
124 43). These ecotypes have increased genomic divergence in several large  
125 chromosomal inversions (43–47), suggestive of local adaptation. The  
126 environments that these two ecotypes encounter are different, and they feed on  
127 distinct types of food. NEAC consumes mostly capelin and herring and NCC  
128 feeds on a wide range of crustaceans, fish and seaweed (34, 39, 48). During  
129 spawning, these ecotypes spatially co-occur, and long-term gene flow between  
130 ecotypes is supported by low overall estimates of divergence in most genomic  
131 regions, apart from the chromosomal rearrangements (43).

132

133 We hypothesize that if *interspecific selection* (indicative of host-selection) is the  
134 main driver for the intestinal communities in the *Gadidae*, most differences will  
135 be found *between the different species*, and not between the different ecotypes  
136 within Atlantic cod. In contrast, if *environmental factors* are the main drivers for  
137 the intestinal communities, we expect significant compositional differences  
138 *between the ecotypes* of Atlantic cod as well as varying levels of differentiation  
139 between the species. We use taxonomic profiling of metagenomic shotgun reads  
140 to classify these microbiomes –obtained from various locations around the  
141 Norwegian coast– at order and species-level resolution and analyze within-  
142 species differentiation of the most abundant members by genome-wide single  
143 nucleotide variation. Finally, differences in gut bacterial community  
144 composition among the species and ecotypes are assessed using multivariate  
145 statistics.

146

## 147 **2. Methods**

### 148 **2.1 Sample collection**

149 Northeast Atlantic cod (*Gadus morhua*) (NEAC, 10 individuals) were collected  
150 in Lofoten (N68.0619167, E13.5921667) in March 2014, and Norwegian coastal  
151 cod (*Gadus morhua*) (NCC, 10 individuals) at the same location in August 2014  
152 (Fig. 1a, Table S1). NCC (2 individuals) were also collected in the Oslo Fjord  
153 (N58.9125100, E9.9202624 & N59.8150006, E10.5544914). Norway pout  
154 (*Trisopterus esmarkii*, 4 individuals), poor cod (*Trisopterus minutus*, 5  
155 individuals) and northern silvery pout (*Gadiculus thori*, 3 individuals) were  
156 collected in the inner Oslo Fjord in May 2015 (Table S1). All fish specimens  
157 were collected from wild populations. A 3 cm long part of the hindgut  
158 (immediately above the short, wider rectal chamber) was aseptically removed  
159 *post-mortem* by scalpel and stored on 70% ethanol. The samples were frozen (-  
160 20°C) for long-term storage. Relevant metadata such as length, weight, sex and  
161 maturity were registered. We always strive to reduce the impact of our sampling  
162 needs on populations and individuals. Therefore, samples were obtained as a  
163 byproduct of conventional business practice. Specimens were caught by  
164 commercial vessels, euthanized by local fishermen and were intended for human  
165 consumption. Samples were taken post-mortem and no scientific experiments  
166 have been performed on live animals. This sampling follows the guidelines set  
167 by the “Norwegian consensus platform for replacement, reduction and  
168 refinement of animal experiments” (49) and does not fall under any specific  
169 legislation in Norway, requiring no formal ethics approval.

### 170 **2.2 Sample preparation and DNA extraction**

171 Intestinal samples were split open lengthwise, before the combined gut content  
172 and mucosa was gently removed using a sterile disposable spatula. Each

173 individual sample was washed in 500  $\mu$ l 100% EtOH and centrifuged before the  
174 ethanol was allowed to evaporate, after which dry weight was measured before  
175 proceeding to DNA extraction. DNA was extracted from between < 10 and 300  
176 mg dry weight of gut content using the *MoBio Powersoil HTP 96 Soil DNA*  
177 *Isolation Kit* (Qiagen, Valencia, CA, USA) according to the DNA extraction  
178 protocol (v. 4.13) utilized by the Earth Microbiome Project (50). DNA was  
179 eluted in 100  $\mu$ l Elution buffer, and stored at -20° Celsius. Due to high  
180 methodological consistency between biological replicates in previous  
181 experiments, only one sample was collected per fish (32).

### 182 **2.3 Sequence data generation and filtering**

183 Quality and quantity of the DNA was measured using a Qubit fluorometer (Life  
184 Technologies, Carlsbad, CA, USA), and normalized by dilution. DNA libraries  
185 were prepared using the *Kapa HyperPlus* kit (Roche Sequencing, Pleasanton,  
186 CA, USA) and paired-end sequenced (2x125 base pairs) on an Illumina  
187 HiSeq2500 using the HiSeq SBS V4 chemistry with dual-indexing in two  
188 independent sequencing runs. Read qualities were assessed using *FastQC* (51),  
189 before adapter removal, singleton read identification, de-duplication and further  
190 read quality trimming was performed using *Trimmomatic* (ver. 0.36) (52) and  
191 *PRINSEQ-lite* (ver. 0.20.4) (53) (Table S2). PhiX-, host- and human sequences  
192 were removed by mapping reads to the phiX reference genome  
193 [GenBank:J02482.1], the Atlantic cod genome assembly (gadMor 2) (this  
194 applied to all the fish species) (54), and a masked version of the human genome  
195 (HG19) (55) using *BWA* (ver. 0.7.13) (56) or *BBMap* (ver. 37.53) (JGI) with  
196 default parameters, and discarding matching sequences using *seqtk* (ver.  
197 2012.11) (58). All sequence data have been deposited in the European  
198 Nucleotide Archive (ENA) under study accession number PRJEB31095.

## 199 **2.4 Taxonomic profiling**

200 Taxonomic classification of quality trimmed and filtered metagenomic paired-  
201 end reads was performed using *Kaiju* (ver. 1.5.0) (59) (“greedy” heuristic  
202 approach, -e 5), with the NCBI *nr* database (rel. 84) (incl. proteins from fungal  
203 and microbial eukaryotes) as reference (60). Counts of sequences successfully  
204 assigned to orders and species were imported into *RStudio* (ver. 1.1.383) (61)  
205 based on *R* (ver. 3.4.2) (62) for further processing. Filtering of the most  
206 abundant bacterial orders for visualization was based on a minimum relative  
207 abundance threshold of 1% of the total number of sequences per library  
208 (threshold ranging from 5933 - 95,146 depending on sample size). Similarly,  
209 filtering of the most abundant bacterial species was based on a minimum  
210 relative abundance threshold of 2% of the total number of sequences per library  
211 (threshold ranging from 6548 - 190,294 depending on sample size). Any taxon  
212 not exceeding this threshold in at least one (order level)/two (species level)  
213 sample(s) was removed. All filtering was based on the *R* package *genefilter* (ver.  
214 1.62.0) (63). Final results were visualized using the *R* package *ggplot* (ver.  
215 2.2.1) (64). Note: Based on a recent reclassification (65), we refer to the  
216 reference strain *Photobacterium phosphoreum* ANT-2200 (acc. nr.  
217 GCF\_000613045.2) as *Photobacterium kishitanii* (Table S3).

## 218 **2.5 Sequence variation analysis**

219 In order to assess the heterogeneity of the most abundant bacteria in the fish  
220 species, we analyzed the sequence variation in the two genomes with the highest  
221 mean relative abundance over all fish species and ecotypes; *Photobacterium*  
222 *kishitanii* and *Photobacterium iliopiscarium*. Paired-end reads from each  
223 individual fish were mapped to the reference genomes (Table S3) using the  
224 *Snakemake* workflow (66) of *anvi'o* (ver. 5.1) (67) with default parameters in  
225 the “all-against-all” modus (with *anvi-profile --min-coverage-for-variability* 20).

226 Samples of low coverage, restricting detection of SNVs in *anvi'o*, were  
227 excluded from the variation analysis. For each individual sample, variable sites  
228 were identified, and the mean number of these per 1000 bp calculated (variation  
229 density). A variable site required a minimum coverage of 20X. Next, variable  
230 sites with a minimum of 20X coverage in *all* samples were defined as single  
231 nucleotide variants (SNVs, *anvi-gen-variability-profile --min-occurrence 1 --*  
232 *min-coverage-in-each-sample 20*). Coverage, variation density and SNV profiles  
233 were plotted in *RStudio* following the *R* script provided by *anvi'o* (68). The  
234 *anvi'o* SNV output was converted to .vcf format using a custom-developed  
235 script ([https://github.com/srinidhi202/AnvioSNV\\_to\\_vcf](https://github.com/srinidhi202/AnvioSNV_to_vcf)), and the resulting .vcf  
236 files were used in a principal component analysis (PCA) to test for population  
237 differences as implemented in *smartpca* (ver. 6.1.4) (*EIGENSOFT*) (69).

## 238 **2.6 Statistical analysis**

239 Although included in data visualization, the Oslo Fjord NCC samples were  
240 excluded from statistical analysis, due to low sample size ( $n = 2$ ). Within-sample  
241 diversity (alpha diversity) was calculated using the *diversity* function in the *R*  
242 package *vegan* (ver. 2.4-1) (70) based on Shannon, Simpson and Inverse  
243 Simpson indices calculated from non-normalized order-level read counts (Table  
244 S4). Differences in alpha diversity were studied using linear regression. The  
245 “optimal model” (the model that best describes the individual diversity) was  
246 identified through a “top-down” strategy including all covariates (Table S5),  
247 except weight, which highly correlated with length ( $r = 0.95$ ), and selected  
248 through *t*-tests. Model assumptions were verified through plotting of residuals.  
249 Differences in bacterial community structure (beta diversity) between the fish  
250 species or ecotypes were visualized using non-metric multidimensional scaling  
251 (NMDS) plots based on the Bray-Curtis dissimilarity calculated from order-level  
252 sequence counts. Next, pairwise differences in beta diversity between the fish

253 species or ecotypes were tested using Permutational Multivariate Analysis of  
254 Variance (PERMANOVA) in the *R* package *pairwise.adonis* (ver. 0.1) (71), a  
255 wrapper for the *adonis* functions in *vegan* (ver. 2.4-1), based on Bray-Curtis  
256 dissimilarity calculated from order-, genus- and species-level sequence counts.  
257 *pairwise.adonis* was run with 20,000 permutations, and *p* values adjusted for  
258 multiple testing using the Holm method (72). Adjusted *p*-values < 0.05 indicate  
259 statistical significance. PERMANOVA assumes the multivariate dispersion in  
260 the compared groups to be homogeneous; this was verified ( $p > 0.05$ ) using the  
261 *betadisper* function (*vegan*) (Table S6). Similarity percentage (SIMPER)  
262 procedure implemented in *vegan* was used to quantify the contribution of  
263 individual orders to the overall Bray-Curtis dissimilarity between the  
264 species/ecotypes. All beta diversity analyses were based on sequence counts  
265 normalized using a common scaling procedure, following McMurdie & Holmes  
266 2014 (73). This involves multiplying the sequence count of every unit (e.g.  
267 order) in a given library with a factor corresponding to the ratio of the smallest  
268 library size in the dataset to the library size of the sample in question.  
269 Normalization using this procedure effectively results in the library scaling by  
270 averaging an infinite number of repeated sub-samplings. We used Chi-squared  
271 statistics, as implemented in *smartpca* (69), to test for significant differences in  
272 the distribution of SNVs per reference genome, while correcting for multiple  
273 testing using sequential Bonferroni (72).

274

### 275 **3. Results**

276

#### 277 **3.1 Taxonomical composition of the intestinal microbiomes**

278 We analyze a dataset of 422 million paired-end reads, with a median sample size  
279 of 11.9 million reads (8.0 - 19.6 million reads per sample) (Table 2, Table S7).

280 Following filtering, order level classification could be obtained for 93% of all  
281 sequences (Table 2). Based on non-normalized order-level sequence counts, we  
282 observe clear patterns of separation between species and ecotypes in a  
283 multivariate NMDS plot (Fig. 1b), with NEAC and northern silvery pout  
284 forming distinct clusters, whereas the NCC populations encompasses the  
285 Norway pout and poor cod populations. *Vibrionales* is the most abundant order  
286 in the intestinal microbiomes of NCC specimens at both coastal locations (mean  
287 relative abundance (MRA): 76%) as well as Norway pout (MRA: 79%) and  
288 poor cod (MRA: 44%) (Fig. 2a, Table 3), with the remainder of each gut  
289 community consisting of a mix of orders with low relative abundance. The  
290 intestinal microbiome of the NEAC and northern silvery pout specimens have a  
291 significantly more diverse community composition (Fig. 2a, Fig. 3). NEAC is  
292 dominated by *Bacteroidales* (MRA: 21%), *Vibrionales* (MRA: 17%),  
293 *Clostridiales* (MRA: 12%) and *Brevinematales* (MRA: 7%) and northern silvery  
294 pout has a high relative abundance of orders *Brachyspirales* (MRA: 16%) and  
295 *Clostridiales* (MRA: 14%). Distinct from the gut community of the other fish  
296 populations, northern silvery pout has a low abundance of *Vibrionales*. Finally,  
297 the amount of sequences in the “Others” category, as well as sequences  
298 classified above order level (mean all samples: 7.8%), vary slightly between the  
299 fish species (Table S8). A species-level classification was obtained for 66% of  
300 all sequences. Overall, species of the genus *Photobacterium* comprise on  
301 average 40.6% of the classified sequences, ranging from 0.2% in northern  
302 silvery pout to 74.3% in Norway pout (Fig. 2b). In particular, *P. kishitanii* and  
303 *P. iliopiscarium* represent on average 43% and 36% of all *Photobacterium*  
304 species, although the ratio differs in the different fish species (e.g. 49% vs. 41%  
305 in NCC, 16% vs. 56% in NEAC and 55% vs. 12% in Norway pout).

306

307 The NCC Lofoten intestinal microbiome is dominated by *P. iliopiscarium*  
308 (MRA: 21%) and *P. kishitanii* (MRA: 20%), followed by different species of

309 *Aliivibrio* (*wodanis*, *logei* and *fischeri*) (MRA: 13%) (Fig. 2b). Similarly, the  
310 bacterial gut community of Norway pout is also dominated by *Photobacterium*  
311 species, in particular *P. kishitanii* (MRA: 17%). The intestinal microbiome of  
312 poor cod is dominated by *Photobacterium* species (MRA: 18%), followed by  
313 different *Vibrio* spp. (MRA: 8%). The gut bacterial community of NEAC is  
314 more diverse, with high relative abundance of a *Brevinema* sp. (MRA: 31%) and  
315 different species in the genera *Photobacterium* (MRA: 34%), *Clostridium*  
316 (MRA: 12%) and *Aliivibrio* (MRA: 9%). The high abundance of *Bacteroidales*  
317 observed at the order level (Fig. 2a) is not reflected at the species level, as this  
318 order represents a high number of *Bacteroidales* species with low abundance.  
319 Consequently, no *Bacteroidales* species are among the 15 most abundant species  
320 in the NEAC intestinal microbiome (Fig. 2b). The NEAC samples also contain a  
321 *Mucispirillum* sp. (MRA: 4%) and two *Brachyspira* spp. (MRA: 2%). In  
322 northern silvery pout, the gut microbiome is quite evenly distributed between  
323 the *Brevinema* sp., the *Mucispirillum* sp., *Brachyspira pilosicoli*, *Brachyspira*  
324 sp. CAG:700 and a group of different *Clostridium* species in two of three  
325 samples. The third sample contains the same species, but has an even higher  
326 relative abundance of the *Brevinema* sp. (64%) (Fig. 2b).

### 327 **3.2 Variation in bacterial community composition among species and** 328 **ecotypes**

329 Significant differences in within-sample diversity (alpha diversity) at the order  
330 level are observed among all species and within-species ecotypes, except  
331 between NCC and Norway pout (Table 4, Table S5). None of the other  
332 covariates have a significant effect on alpha diversity. Similar to the results from  
333 the within-sample diversity, significant differences in community structure (beta  
334 diversity) are observed among the gadoid species at order-, genus- and species  
335 level (Table 5, Table S6). At the order level, the NEAC intestinal community

336 has a different structure than what is observed in all the other gadoids (0.05  
337 significance level). The NCC intestinal microbiome is also different from that of  
338 both poor cod and northern silvery pout. In agreement with results of within-  
339 sample (alpha) diversity, no differences in community structure are observed  
340 between the microbiomes of NCC and Norway pout. Finally, no differences are  
341 observed between the gut microbiome of poor cod vs. Norway pout, poor cod  
342 vs. northern silvery pout or Norway pout vs. northern silvery pout ( $p = 0.074$  for  
343 all). Beta diversity analysis also demonstrate that community differences at the  
344 genus and species level are similar to those observed at the order level (Table  
345 S6).

346  
347 Differences in the intestinal community composition between these gadoids are  
348 predominantly explained by changes in the relative abundance of a limited  
349 number of orders. For example, different proportions of *Vibrionales* contribute  
350 29% to the (Bray-Curtis) dissimilarity between the NCC and NEAC ( $p = 0.001$ ),  
351 followed by differences in the relative abundance of *Bacteroidales*, explaining  
352 10% of the dissimilarity ( $p = 0.001$ ) (Table S9). Together, 80% of the observed  
353 dissimilarity between NCC and NEAC is explained by differences in their  
354 relative abundance of the top six orders. Similarly, 60% of the dissimilarity  
355 between NCC and northern silvery pout are driven by *Vibrionales*,  
356 *Brachyspirales* and *Clostridiales*.

### 357 **3.3 Bacterial within-species variation of Single Nucleotide Variant** 358 **heterogeneity**

359 We investigated bacterial within-species variation of *P. iliopiscarium* and *P.*  
360 *kishitanii* –with sufficient read coverage across all samples– among the different  
361 gadoids by mapping sequencing reads to their respective reference genomes  
362 (GCF\_000949935.1, GCF\_000613045.2). In the samples used for SNV analysis,

363 the mean percentage of the reference genomes with minimum 20-fold coverage  
364 (coverage breadth) after mapping were 63% for *P. iliopiscarium* and 19% for *P.*  
365 *kishitanii*. Hence, the variation analysis of the two species is based on different  
366 proportions of the reference genomes. The two reference genomes greatly vary  
367 in the number of SNVs observed in all samples, from 84,866 in *P. iliopiscarium*  
368 to 1229 in *P. kishitanii*, Fig. 4a). The density of variable sites within each  
369 individual sample shows varying levels of heterogeneity in the bacterial  
370 populations (Fig. 4b). This heterogeneity is particularly clear in *P. kishitanii*,  
371 with sites-density varying from 0.5 to 45.4 variant positions per Kbp per  
372 individual specimen. Further, the heatmap shows gadoid specific SNV patterns  
373 (Fig. 4c), in particular for *P. iliopiscarium*, where Norway pout contains a  
374 distinct pattern compared to the other gadoids, indicating the presence of  
375 specific *P. iliopiscarium* strain(s). Statistical analyses of SNV variation reveals  
376 that NEAC has a significantly different SNV pattern from Norway pout (Chi-  
377 square,  $p = 0.017$ ) and poor cod ( $p = 0.028$ ) for *P. kishitanii*, and from NCC ( $p =$   
378  $0.033$ ) and Norway pout ( $p = 0.000$ ) for *P. iliopiscarium* (Fig. 4d, Table S10).  
379 NCC has a significantly different SNV pattern from Norway pout ( $p = 0.003$ )  
380 for *P. iliopiscarium*. (Fig. 4d, Table S10). The relative abundance of *P.*  
381 *kishitanii* and *P. iliopiscarium* vary greatly among the fish specimens used in the  
382 variation analysis (Fig. 4e).

383

#### 384 **4. Discussion**

385

386 Using metagenomic shotgun sequencing, we show the composition of the  
387 intestinal microbiomes of two Atlantic cod ecotypes (NEAC, NCC) to be at least  
388 as divergent as those found between the different codfish species investigated  
389 here. Our findings have several implications for our understanding of the  
390 composition of the intestinal microbiome in wild fish populations.

391

392 Although species-specific selection has been proposed as a factor driving the  
393 composition of the intestinal community in fish in a variety of settings (13, 14,  
394 16–19, 29, 33), our results show that this may not be the most important driver  
395 among gadoid species in wild populations. First, we observe highly significant  
396 differences in the intestinal microbiomes at *order*-, *species*- and *within-species*  
397 bacterial level between the NEAC and NCC ecotypes. Despite showing different  
398 migratory behavior, these ecotypes co-occur during seasonal spawning in  
399 northern Norway (Lofoten), from where most of the samples are collected (43–  
400 45). Second, we observe no significant bacterial *order*- or *species*-level  
401 differences in the intestinal microbiome between different gadoid species,  
402 Atlantic cod (ecotype NCC) and Norway pout, which are sampled from different  
403 geographical locations (Lofoten and Oslo fjord). We visually do not observe any  
404 differentiation between the NCC sampled from Lofoten and the Oslo fjord  
405 (although statistical certainty is low), which reflects an earlier observed lack of  
406 geographical structure for this ecotype (30). The similar microbial composition  
407 of the NCC and Norway pout is striking, as these are distinctly different genetic  
408 lineages with an evolutionary separation of at least 20 million years (24). These  
409 results suggest that NCC and Norway pout occupy an environmental niche that  
410 allows bacterial members with a broad geographical distribution to colonize  
411 their intestinal communities. Overall, the observation of a significant  
412 differentiation between microbiomes from ecotypes of the same species *and* a  
413 lack of differentiation between microbiomes from two distinct species, suggest  
414 that the intestinal microbiome in these gadoid species and ecotypes is not driven  
415 by species-specific selection alone.

416

417 There are several factors that may underlie the compositional differences in the  
418 NCC and NEAC intestinal microbiomes. First, for more than 10 months during  
419 the year, the two populations encounter different habitats, as the NEAC ecotype

420 is distributed in the pelagic waters of the Barents Sea, while NCC remains more  
421 stationary in coastal waters (74). Although several 16S rRNA-based studies  
422 have reported limited effects of geographic location on the composition and  
423 diversity of the fish intestinal microbiome (32, 75), the Barents Sea has  
424 significantly lower temperatures (76) compared to Norwegian coastal waters  
425 (77). Temperature has been shown to have a significant impact on the intestinal  
426 microbiome in several studies (e.g., Senegalese sole (*Solea senegalesis*),  
427 Tasmanian Atlantic Salmon (*Salmo salar*) and mummichog (*Fundulus*  
428 *heteroclitus*) (5, 78, 79) but not in all cases (e.g., Atlantic salmon (80). Second,  
429 the ecotypes were sampled during different seasons; NCC Lofoten during  
430 summer (August) and NEAC during winter/early spring (March). Nonetheless, a  
431 lack of difference between NCC Lofoten (August) and NCC Oslo fjord (May)  
432 suggests that seasonality is unlikely to fully explain the observed differences  
433 between NEAC and NCC. Third, the ecotypes show different feeding behavior;  
434 while the NEAC during foraging and spawning migrations from the Barents Sea  
435 may perform vertical movements down to 500 meters (42, 81, 82), NCC mainly  
436 occupy shallow and warmer coastal and fjord waters (83). This behavior exposes  
437 the two ecotypes to different sources of food, with NEAC predominantly eating  
438 capelin and herring (48), and NCC living of a more diverse diet, including  
439 crustaceans, fish and even seaweeds (34, 39). Diet has been shown to influence  
440 the composition of the intestinal microbiome in several fish species (9, 10, 13,  
441 78, 84, 85). Finally, Barents Sea has a high microbial biodiversity compared to  
442 coastal areas (86). The specific bacterial load in the surrounding waters also  
443 influences the intestinal microbiome composition in fish, including Atlantic cod  
444 (3, 4). Nonetheless, because these different environmental and behavioral factors  
445 are correlated, it is unclear which of these parameters contributes the most to the  
446 observed differences in the intestinal microbiome composition between these  
447 ecotypes.

448

449 Comparing two spatially separated coastal Atlantic cod populations,  
450 metagenomic shotgun data revealed no strain-level differentiation (30). In this  
451 study, we find specific SNV variants amongst the most abundant bacterial  
452 species that are associated with either species or Atlantic cod ecotype. This  
453 indicates that NEAC harbor different strains of *P. iliopiscarium* than those  
454 identified in the NCC ecotype and the other gadoid species. Our current study  
455 encompasses a significantly greater geographical area and taxonomical samples  
456 than the earlier coastal comparison (30–32), and is indicative of strain-level  
457 variation at such larger comparative scales. In line with Riiser et al. 2019 (30),  
458 this study shows that such strain-level differences cannot be detected using 16S  
459 rRNA techniques alone, and that metagenomic shotgun sequencing is currently  
460 the most accurate approach to detect strain-level spatial variation in the marine  
461 environment.

462

463 Most striking amongst the comparisons of gadoid species are the microbiome  
464 differences observed in NEAC, northern silvery pout and poor cod compared to  
465 NCC and Norway pout. Several bacterial species that drive this differentiation  
466 are of particular interest. First, two bacterial species, *Mucispirillum* sp. and  
467 *Brevinema* sp., are almost exclusively detected in the intestinal microbiomes of  
468 NEAC and northern silvery pout. Nonetheless, these genera are represented by a  
469 single species in the *RefSeq* database (60) (accessed 10.01.19) and hence little is  
470 known. *B. andersonii* (order *Brevinematales*) was originally identified in short-  
471 tailed shrews (*Blarina brevicauda*) and white-footed mice (*Peromyscus*  
472 *leucopus*), and were found unable to grow below 25°C (87). *Brevinema* sp. has  
473 previously been identified in Atlantic cod (32) and in Atlantic salmon (88).  
474 *Mucispirillum schaedleri* (order *Deferribacterales*) is a mucosa-associated  
475 member of the intestinal microbiome in terrestrial animals as pigs, goats and  
476 rodents, where it is thought to be involved in mucus production through  
477 expression of lectins, important components in the innate immune response (89,

478 90). Nevertheless, the distant relationship between Atlantic cod and these  
479 terrestrial hosts, and the availability of only single reference genomes for  
480 *Mucispirillum* and *Brevinema*, strongly suggests that the representatives found  
481 here represent related, but novel species with a different intestinal ecology and  
482 physiology. Second, both NEAC and northern silvery pout contain significant  
483 fractions of *Brachyspira* spp., previously identified as dominant members in the  
484 gut of the carnivorous marine fish species mahi mahi (*Coryphaena hippurus*)  
485 (12, 91). *Brachyspira* spp. are known as intestinal pathogens in pigs and humans  
486 (92, 93), although recent studies show that *Brachyspira* spp. are more  
487 widespread in the wildlife community than previously thought, including in  
488 freshwater (94). The ecology of *Brachyspira* in the marine environment is  
489 unclear, although an association with the carnivorous diet of mahi mahi and  
490 NEAC may suggest that the diet of northern silvery pout also has a considerable  
491 carnivorous component. Third, poor cod is the only species with considerable  
492 abundance of *Enterovibrio norvegicus* (Table S11). This bacterium within the  
493 *Vibrionaceae* family was isolated from the intestines of cultured turbot  
494 (*Scophthalmus maximus*) larvae in Norway, and classified as a novel species  
495 phenotypically similar to the *Vibrio* genus (95). Interestingly, poor cod are also  
496 host to the highest abundance of *Vibrio* spp. among the fish species in this study  
497 (Table S11). Other *Enterovibrio* species have been found in association with  
498 diseased corals (96) and internal organs of cultured fish species in the  
499 Mediterranean Ocean (97–99). However, little is known about the function of  
500 this relatively novel genus in fish intestines.

501  
502 Given the observations of species specific selection for a similar microbiome in  
503 various teleosts and range of habitats (13, 14, 16–19, 29, 33), the diverse  
504 microbiomes *within* and *among* gadoid species may suggest that their intestinal  
505 communities could be more easily modulated by external factors. At this stage,  
506 limited sampling across various fish taxa and the lack of comparative

507 approaches leave reasons for such diverse communities speculative.  
508 Nonetheless, it is interesting to note that all gadoids have unusual adaptive  
509 immune system –through the loss of MHC II, CD4 and invariant chain (Ii) and a  
510 range of innate (TLR) and MHC I immune-gene expansions (23, 24). There are  
511 significant correlations between immune genes and the vertebrate microbiome  
512 (100, 101), and it has been hypothesized that adaptive immunity has evolved to  
513 help maintain complex community of beneficial commensal bacteria (102).  
514 Indeed, studies of wild-type zebrafish and knockout zebrafish without a  
515 functional adaptive immune system suggested that adaptive immunity increases  
516 the strength of host filtering of potential fish-associated microbes (22). The  
517 unusual adaptive immune system of gadoids may therefore affect the strength of  
518 co-evolutionary associations with their microbiome.

519

## 520 **5. Conclusion**

521 Based on metagenomic shotgun sequencing, we here characterize the intra- and  
522 interspecific community composition among two ecotypes of Atlantic cod and  
523 three related fish species in the *Gadidae* family. Several of these fish species  
524 harbor unique, and possibly novel bacterial species. We identify a complex  
525 pattern of diversity with significant differences between the Atlantic cod  
526 ecotypes, and variable interspecific patterns of variation. Although most species  
527 and ecotypes yield different communities, those found in coastal cod (NCC) and  
528 Norway pout are not significantly diverged, indicating that ecological niche  
529 plays an important role in determining the intestinal microbiomes in these  
530 gadoid species.

531

## 532 **Conflict of interest**

533 The authors declare that the research was conducted in the absence of any  
534 commercial or financial relationships that could be construed as a potential  
535 conflict of interest.

536

### 537 **Authors' contributions**

538 SJ, BS and THA conceived and designed the experiments. KSJ provided the  
539 initial framework for the study. ESR and SJ sampled the specimens. ESR  
540 performed the laboratory work. ESR and THA performed data analysis. SV  
541 created the Python script to convert the anvi'o format to VCF. ØB, THA, ESR  
542 and BS interpreted the results. ESR and BS wrote the paper with input of all  
543 authors. All authors read and approved the final manuscript.

544

### 545 **Funding**

546 This work was funded by a grant from the Research Council of Norway (project  
547 no. 222378) and University of Oslo (Strategic Research Initiative) – both to  
548 KSJ.

549

### 550 **Acknowledgements**

551 We thank Børge Iversen and Helle Tessand Baalsrud for their kind help in  
552 sampling Atlantic cod specimens in Lofoten, and Martin Malmstrøm, Paul  
553 Ragnar Berg and Monica Hongrø Solbakken for sampling at Sørøya. We are  
554 grateful for the metagenome sequencing performed at the Norwegian  
555 Sequencing Centre (NSC: <https://www.sequencing.uio.no>).

556

### 557 **Availability of data and materials**

558 The data set generated and analyzed for this study is available in the European  
559 Nucleotide Archive (ENA), study accession number PRJEB31095.

560

### 561 **References**

562

- 563 1. Wang AR, Ran C, Ringø E, Zhou ZG. 2017. Progress in fish  
564 gastrointestinal microbiota research. *Rev Aquac* 0:1–15.
- 565 2. Romero J, Ringø E, Merrifield DL. 2014. The Gut Microbiota of Fish.  
566 *Aquac Nutr* 75–100.
- 567 3. Nayak SK. 2010. Role of gastrointestinal microbiota in fish. *Aquac Res*  
568 41:1553–1573.
- 569 4. Olafsen JA. 1983. Ingestion of bacteria by cod (*Gadus morhua* L.) larvae,  
570 p. 627–643. *In* The Propagation of Cod *Gadus morhua* L.: an international  
571 symposium.
- 572 5. Neuman C, Hatje E, Zarkasi KZ, Smullen R, Bowman JP, Katouli M.  
573 2016. The effect of diet and environmental temperature on the faecal  
574 microbiota of farmed Tasmanian Atlantic Salmon (*Salmo salar* L.). *Aquac*  
575 *Res* 47:660–672.
- 576 6. Zarkasi KZ, Taylor RS, Abell GCJ, Tamplin ML, Glencross BD, Bowman  
577 JP. 2016. Atlantic Salmon (*Salmo salar* L.) Gastrointestinal Microbial  
578 Community Dynamics in Relation to Digesta Properties and Diet. *Microb*  
579 *Ecol* 71:589–603.
- 580 7. Zhou Z, Olsen RE. 2012. Culturable autochthonous gut bacteria in Atlantic  
581 salmon (*Salmo salar* L.) fed diets with or without chitin. Characterization  
582 by 16S rRNA gene sequencing, ability to produce enzymes and in vitro  
583 growth inhibition of four fish pathogens.
- 584 8. Schmidt V, Amaral-Zettler L, Davidson J, Summerfelt S, Good C. 2016.  
585 Influence of fishmeal-free diets on microbial communities in Atlantic  
586 salmon (*Salmo salar*) recirculation aquaculture systems. *Appl Environ*  
587 *Microbiol* 82:4470–4481.
- 588 9. Desai AR, Links MG, Collins SA, Mansfield GS, Drew MD, Van Kessel  
589 AG, Hill JE. 2012. Effects of plant-based diets on the distal gut  
590 microbiome of rainbow trout (*Oncorhynchus mykiss*). *Aquaculture* 350–  
591 353:134–142.
- 592 10. Bolnick DI, Snowberg LK, Hirsch PE, Lauber CL, Org E, Parks B, Lusi  
593 AJ, Knight R, Caporaso JG, Svanba R. 2014. Individual diet has sex-  
594 dependent effects on vertebrate gut microbiota. *Nat Commun* 5.
- 595 11. Bolnick DI, Snowberg LK, Hirsch PE, Lauber CL, Knight R, Caporaso  
596 JG, Svanbäck R. 2014. Individuals' diet diversity influences gut microbial  
597 diversity in two freshwater fish (threespine stickleback and Eurasian  
598 perch). *Ecol Lett* 17:979–87.
- 599 12. Givens CE, Ransom B, Bano N, Hollibaugh JT. 2015. Comparison of the  
600 gut microbiomes of 12 bony fish and 3 shark species. *Mar Ecol Prog Ser*  
601 518:209–223.
- 602 13. Miyake S, Ngugi DK, Stingl U. 2015. Diet strongly influences the gut  
603 microbiota of surgeonfishes. *Mol Ecol* 24:656–672.
- 604 14. Roeselers G, Mittge EK, Stephens WZ, Parichy DM, Cavanaugh CM,

- 605 Guillemin K, Rawls JF. 2011. Evidence for a core gut microbiota in the  
606 zebrafish. *ISME J* 5:1595–608.
- 607 15. Ley RE, Ley RE, Hamady M, Lozupone C, Turnbaugh PJ, Ramey RR,  
608 Bircher JS, Schlegel ML, Tucker TA, Schrenzel MD, Knight R, Gordon JI.  
609 2008. Evolution of Mammals and Their Gut Microbes. *Science* 1647.
- 610 16. Zhang M, Sun Y, Liu Y, Qiao F, Chen L, Liu WT, Du Z, Li E. 2016.  
611 Response of gut microbiota to salinity change in two euryhaline aquatic  
612 animals with reverse salinity preference. *Aquaculture* 454:72–80.
- 613 17. Li X, Yu Y, Feng W, Yan Q, Gong Y. 2012. Host Species as a Strong  
614 Determinant of the Intestinal Microbiota of Fish Larvae. *J Microbiol*  
615 50:29–37.
- 616 18. Li J, Ni J, Li J, Wang C, Li X, Wu S, Zhang T, Yu Y, Yan Q. 2014.  
617 Comparative study on gastrointestinal microbiota of eight fish species with  
618 different feeding habits. *J Appl Microbiol* 117:1750–1760.
- 619 19. Navarrete P, Magne F, Araneda C, Fuentes P, Barros L, Opazo R, Espejo  
620 R, Romero J. 2012. PCR-TTGE analysis of 16S rRNA from Rainbow trout  
621 (*Oncorhynchus mykiss*) gut microbiota reveals host-specific communities  
622 of active bacteria. *PLoS One* 7:1–10.
- 623 20. Bolnick DI, Snowberg LK, Caporaso JG, Lauber C, Knight R, Stutz WE.  
624 2014. Major Histocompatibility Complex class IIb polymorphism  
625 influences gut microbiota composition and diversity. *Mol Ecol* 23:4831–  
626 45.
- 627 21. Salinas I, Casadei E, Takizawa F, Shibasaki Y, Sunyer OJ. 2018.  
628 Interactions between microbiota and the teleost immune system in health  
629 and disease. *J Immunol* 200.
- 630 22. Stagaman K, Burns AR, Guillemin K, Bohannan BJM. 2017. The role of  
631 adaptive immunity as an ecological filter on the gut microbiota in  
632 zebrafish. *ISME J March*:1–10.
- 633 23. Star B, Nederbragt AJ, Jentoft S, Grimholt U, Malmstrøm M, Gregers TF,  
634 Rounge TB, Paulsen J, Solbakken MH, Sharma A, Wetten OF, Lanzén A,  
635 Winer R, Knight J, Vogel J-H, Aken B, Andersen O, Lagesen K,  
636 Tooming-Klunderud A, Edvardsen RB, Tina KG, Espelund M, Nepal C,  
637 Previti C, Karlsen BO, Moum T, Skage M, Berg PR, Gjøen T, Kuhl H,  
638 Thorsen J, Malde K, Reinhardt R, Du L, Johansen SD, Searle S, Lien S,  
639 Nilsen F, Jonassen I, Omholt SW, Stenseth NC, Jakobsen KS. 2011. The  
640 genome sequence of Atlantic cod reveals a unique immune system. *Nature*  
641 477:207–10.
- 642 24. Malmstrøm M, Matschiner M, Tørresen OK, Star B, Snipen LG, Hansen  
643 TF, Baalsrud HT, Nederbragt AJ, Hanel R, Salzburger W, Stenseth NC,  
644 Jakobsen KS, Jentoft S. 2016. Evolution of the immune system influences  
645 speciation rates in teleost fishes. *Nat Genet* 48:1204–1210.
- 646 25. Magnadottir B, Gudmundsdottir S, Gudmundsdottir BK, Helgason S.  
647 2009. Natural antibodies of cod (*Gadus morhua* L.): Specificity, activity

- 648 and affinity. *Comp Biochem Physiol Part B* 154:309–316.
- 649 26. Pilström L, Warr G, Strömberg S. 2005. Why is the antibody response of  
650 Atlantic cod so poor? The search for a genetic explanation. *Fish Sci*  
651 71:961–971.
- 652 27. Solem ST, Stenvik J. 2006. Antibody repertoire development in teleosts —  
653 a review with emphasis on salmonids and *Gadus morhua* L. *Dev Comp*  
654 *Immunol* 30:57–76.
- 655 28. Star B, Jentoft S. 2012. Why does the immune system of Atlantic cod lack  
656 MHC II? *Bioessays* 34:648–51.
- 657 29. Sullam KE, Essinger SD, Lozupone CA, O’Connor MP, Rosen GL,  
658 Knight R, Kilham SS, Russell JA. 2012. Environmental and ecological  
659 factors that shape the gut bacterial communities of fish: a meta-analysis.  
660 *Mol Ecol* 21:3363–78.
- 661 30. Riiser ES, Haverkamp THA, Varadharajan S, Borgan Ø, Jakobsen KS,  
662 Jentoft S. 2019. Switching on the light: using metagenomic shotgun  
663 sequencing to characterize the intestinal microbiome of Atlantic cod.  
664 *Environ Microbiol* 21:2576–2594.
- 665 31. Star B, Haverkamp TH, Jentoft S, Jakobsen KS. 2013. Next generation  
666 sequencing shows high variation of the intestinal microbial species  
667 composition in Atlantic cod caught at a single location. *BMC Microbiol*  
668 13:248.
- 669 32. Riiser ES, Haverkamp THA, Borgan Ø, Jakobsen KS, Jentoft S, Star B.  
670 2018. A single Vibrionales 16S rRNA oligotype dominates the intestinal  
671 microbiome in two geographically separated Atlantic cod populations.  
672 *Front Microbiol* 9:1–14.
- 673 33. Sevellec M, Laporte M, Bernatchez A, Derome N, Bernatchez L. 2019.  
674 Evidence for host effect on the intestinal microbiota of whitefish  
675 (*Coregonus* sp.) species pairs and their hybrids. *Ecol Evol* 9:11762–11774.
- 676 34. Cohen DM, Inada T, Iwamoto T, Scialabba N. 1990. Gadiform fishes of  
677 the world (Order Gadiformes). An annotated and illustrated catalogue of  
678 cods, hakes, grenadiers and other gadiform fishes known to date. *FAO*  
679 *Species Catalogue*.
- 680 35. Froese R, Pauly D. 2019. fishbase.org, version (06/2018). fishbase.org.
- 681 36. Gaemers PAM, Poulsen JY. 2017. Recognition and Distribution of Two  
682 North Atlantic Gadidulus Species, *G. argenteus* and *G. thori* (*Gadidae*),  
683 Based on Otolith Morphology, Larval Pigmentation, Molecular Evidence,  
684 Morphometrics and Meristics. *Fishes* 2:1–24.
- 685 37. Albert OT. 1993. Distribution, population structure and diet of silvery pout  
686 (*Gadidulus argenteus thori* J. Schmidt), poor cod (*Trisopterus minutus*  
687 *minutus* (L.)), four-bearded rockling (*Rhinonemus cimbrius* (L.)), and  
688 Vahl’s eelpout (*Lycodes vahlii gracilis* Reinhardt) in the Norwegian Deep.  
689 *Sarsia* 78:141–154.
- 690 38. Froese, Rainer and Pauly D. 2012. Species Fact Sheets: *Gadus morhua*

- 691 (Linnaeus, 1758) Food and Agriculture Organization of the United  
692 Nations.
- 693 39. Link JS, Bogstad B, Sparholt H, Lilly GR. 2009. Trophic role of Atlantic  
694 cod in the ecosystem. *Fish Fish* 10:58–87.
- 695 40. Link JS, Garrison LP. 2002. Trophic ecology of Atlantic cod (*Gadus*  
696 *morhua*) on the Northeast US continental shelf. *Mar Ecol Prog Ser*  
697 227:109–123.
- 698 41. Michalsen K, Johannesen E, Bogstad B. 2008. Feeding of mature cod  
699 (*Gadus morhua*) on the spawning grounds in Lofoten. *ICES J Mar Sci*  
700 65:571–580.
- 701 42. Godø OR, Michalsen K. 2000. Migratory behaviour of North-east Arctic  
702 cod, studied by use of data storage tags. *Fish Res* 48:127–140.
- 703 43. Berg PR, Star B, Pampoulie C, Sodeland M, Barth JMI. 2016. Three  
704 chromosomal rearrangements promote genomic divergence between  
705 migratory and stationary ecotypes of Atlantic cod. *Sci Rep* 6:1–12.
- 706 44. Berg PR, Star B, Pampoulie C, Bradbury IR, Bentzen P, Hutchings JA,  
707 Jentoft S, Jakobsen KS. 2017. Trans-oceanic genomic divergence of  
708 Atlantic cod ecotypes is associated with large inversions. *Heredity (Edinb)*  
709 119:418–428.
- 710 45. Star B, Boessenkool S, Gondek AT, Nikulina EA, Hufthammer AK,  
711 Pampoulie C, Knutsen H, André C, Nistelberger HM, Dierking J, Petereit  
712 C, Heinrich D, Jakobsen KS, Jentoft S, Stenseth NC, Barrett JH. 2017.  
713 Ancient DNA reveals the Arctic origin of Viking Age cod. *Proc Natl Acad*  
714 *Sci U S A* 114:9152–9157.
- 715 46. Kirubakaran TG, Grove H, Kent MP, Sandve SR, Baranski M, Nome T,  
716 Rosa MCDE, Righino B, Johansen T. 2016. Two adjacent inversions  
717 maintain genomic differentiation between migratory and stationary  
718 ecotypes of Atlantic cod. *Mol Ecol* 25:2130–2143.
- 719 47. Sodeland M, Jorde PE, Lien S, Jentoft S, Berg PR, Grove H, Kent MP,  
720 Arnyasi M, Olsen EM, Knutsen H. 2016. “Islands of Divergence” in the  
721 Atlantic Cod Genome Represent Polymorphic Chromosomal  
722 Rearrangements. *Genome Biol Evol* 8:1012–1022.
- 723 48. Holt RE, Bogstad B, Durant M, Dolgov A V, Ottersen G. 2019. Barents  
724 Sea cod (*Gadus morhua*) diet composition: long-term interannual,  
725 seasonal, and ontogenetic patterns. *ICES J Mar Sci* May 2019.
- 726 49. Norecopa. Norecopa guidelines for animal experiments.
- 727 50. Gilbert JA, Meyer F, Jansson J, Gordon J, Pace N, Ley R, Fierer N, Field  
728 D, Kyrpides N, Glöckner F. 2010. The Earth Microbiome Project: Meeting  
729 report of the “1st EMP meeting on sample selection and acquisition” at  
730 Argonne National Laboratory October 6th 2010 .
- 731 51. Andrews S. 2010. FastQC.
- 732 52. Bolger AM, Lohse M, Usadel B. 2014. Trimmomatic: A flexible trimmer  
733 for Illumina sequence data. *Bioinformatics* 30:2114–2120.

- 734 53. Schmieder R, Edwards R. 2011. Quality control and preprocessing of  
735 metagenomic datasets. *Bioinformatics* 27:863–864.
- 736 54. Tørresen OK, Star B, Jentoft S, Reinart WB, Grove H, Miller JR, Walenz  
737 BP, Knight J, Ekholm JM, Peluso P, Edvardsen RB, Tooming-Klunderud  
738 A, Skage M, Lien S, Jakobsen KS, Nederbragt AJ. 2017. An improved  
739 genome assembly uncovers prolific tandem repeats in Atlantic cod. *BMC*  
740 *Genomics* 18:1–23.
- 741 55. Genome Reference Consortium. 2009. Genome Reference Consortium  
742 Human Build 37 (GRCh37).
- 743 56. Li H, Durbin R. 2009. Fast and accurate short read alignment with  
744 Burrows – Wheeler transform. *Bioinformatics* 25:1754–1760.
- 745 57. Joint Genome Institute. *BBMap*.
- 746 58. Li H. 2012. *Seqtk*.
- 747 59. Menzel P, Krogh A. 2016. Fast and sensitive taxonomic classification for  
748 metagenomics with Kaiju. *Nat Commun* 7.
- 749 60. O’Leary NA, Wright MW, Brister JR, Ciuffo S, Haddad D, McVeigh R,  
750 Rajput B, Robbertse B, Smith-White B, Ako-Adjei D, Astashyn A,  
751 Badretdin A, Bao Y, Blinkova O, Brover V, Chetvernin V, Choi J, Cox E,  
752 Ermolaeva O, Farrell CM, Goldfarb T, Gupta T, Haft D, Hatcher E,  
753 Hlavina W, Joardar VS, Kodali VK, Li W, Maglott D, Masterson P,  
754 McGarvey KM, Murphy MR, O’Neill K, Pujar S, Rangwala SH, Rausch  
755 D, Riddick LD, Schoch C, Shkeda A, Storz SS, Sun H, Thibaud-Nissen F,  
756 Tolstoy I, Tully RE, Vatsan AR, Wallin C, Webb D, Wu W, Landrum MJ,  
757 Kimchi A, Tatusova T, DiCuccio M, Kitts P, Murphy TD, Pruitt KD.  
758 2016. Reference sequence (RefSeq) database at NCBI: Current status,  
759 taxonomic expansion, and functional annotation. *Nucleic Acids Res*  
760 44:D733–D745.
- 761 61. Racine JS. 2010. Rstudio: A platform-independent ide for R and  
762 SWEAVE. *Financ Dev* 47:36–37.
- 763 62. R Core Team. 2017. R: A language and environment for statistical  
764 computing. R Found Stat Comput Vienna, Austria.
- 765 63. Gentleman R, Carey V, Huber W, Hahne F. 2019. Package ‘*genefilter*.’
- 766 64. Wickham H. 2009. *Ggplot2 Applied Spatial Data Analysis with R*.
- 767 65. Machado H, Gram L. 2017. Comparative genomics reveals high genomic  
768 diversity in the genus *Photobacterium*. *Front Microbiol* 8:1–14.
- 769 66. Köster J, Rahmann S. 2012. Snakemake - a scalable bioinformatics  
770 workflow engine. *Bioinformatics* 28:2520–2522.
- 771 67. Eren AM, Esen C, Quince C, Vineis JH, Morrison HG, Sogin ML,  
772 Delmont TO. 2015. Anvi’o: An advanced analysis and visualization  
773 platform for ‘omics data. *PeerJ* 3:1–29.
- 774 68. Eren AM, Esen C, Quince C, Vineis JH, Morrison HG, Sogin ML,  
775 Delmont TO. 2015. Visualizing SNV profiles using R. *merenlab.org*.  
776 <http://merenlab.org/tutorials/infant-gut>.

- 777 69. Patterson N, Price AL, Reich D. 2006. Population Structure and  
778 Eigenanalysis. *PLoS Genet* 2.
- 779 70. Oksanen J, Blanchet FG, Friendly M, Kindt R, Legendre P, McGlinn D,  
780 Minchin PR, O'Hara RB, Simpson GL, Solymos P, Stevens MHH, Scoecs  
781 E, Wagner H. 2017. *vegan*: Community Ecology Package R package  
782 version 2.4–3. 2.4.3.
- 783 71. Martinez Arbizu P. 2019. pairwiseAdonis: Pairwise multilevel comparison  
784 using adonis. R package version 0.1.
- 785 72. Holm S. 1979. A Simple Sequentially Rejective Multiple Test Procedure.  
786 *Scand J Stat* 6:65–70.
- 787 73. McMurdie PJ, Holmes S. 2014. Waste Not, Want Not: Why Rarefying  
788 Microbiome Data Is Inadmissible. *PLoS Comput Biol* 10.
- 789 74. Nordeide JT, Johansen SD, Jørgensen TE, Karlsen BO, Moum T. 2011.  
790 Population connectivity among migratory and stationary cod *Gadus*  
791 *morhua* in the Northeast Atlantic — A review of 80 years of study. *Mar*  
792 *Ecol Prog Ser* 435:269–283.
- 793 75. Llewellyn MS, McGinnity P, Dionne M, Letourneau J, Thonier F,  
794 Carvalho GR, Creer S, Derome N. 2016. The biogeography of the Atlantic  
795 salmon (*Salmo salar*) gut microbiome. *ISME J* 10:1280–1284.
- 796 76. Furevik T. 2001. Annual and interannual variability of Atlantic Water  
797 temperatures in the Norwegian and Barents Seas: 1980 - 1996. *Deep Res*  
798 48:383–404.
- 799 77. Eilertsen HC, Skarðhamar J. 2006. Temperatures of north Norwegian  
800 fjords and coastal waters: Variability, significance of local processes and  
801 air-sea heat exchange. *Estuarine, Coast Shelf Sci* 67 67:530–538.
- 802 78. Givens CE. 2012. A fish tale: Comparison of the gut microbiome of 15  
803 fish species and the influence of diet and temperature on its composition.
- 804 79. Martin-Antonio B, Manchado M, Infante C, Zerolo R, Labella A, Alonso  
805 C, Borrego JJ. 2007. Intestinal microbiota variation in Senegalese sole  
806 (*Solea senegalensis*) under different feeding regimes. *Aquac Res* 38:1213–  
807 1222.
- 808 80. Hovda MB, Fontanillas R, Mcgurk C, Obach A, Rosnes JT. 2012.  
809 Seasonal variations in the intestinal microbiota of farmed Atlantic salmon  
810 (*Salmo salar* L.). *Aquac Res* 43:154–159.
- 811 81. Karlsen BO, Klingan K, Emblem Å, Jørgensen TE, Jueterbock A,  
812 Furmanek T, Hoarau G, Johansen SD, Nordeide JT, Moum T. 2013.  
813 Genomic divergence between the migratory and stationary ecotypes of  
814 Atlantic cod. *Mol Ecol* 22:5098–5111.
- 815 82. Stensholt BK. 2001. Cod migration patterns in relation to temperature:  
816 analysis of storage tag data. *ICES J Mar Sci* 58:770–793.
- 817 83. WWF. 2004. The Barents Sea Cod.  
818 [www.wwf.no/core/pdf/wwf\\_codreport\\_2004.pdf](http://www.wwf.no/core/pdf/wwf_codreport_2004.pdf).
- 819 84. Merrifield DL, Olsen RE, Myklebust R, Ringø E. 2011. Dietary Effect of

- 820 Soybean (*Glycine max*) Products on Gut Histology and Microbiota of Fish.  
821 Soybean Nutr 231–250.
- 822 85. Ringø E, Zhou Z, Olsen RE, Song SK. 2012. Use of chitin and krill in  
823 aquaculture - the effect on gut microbiota and the immune system: A  
824 review. Aquac Nutr 18:117–131.
- 825 86. Sakshaug E, Loeng H. 1994. Structure, biomass distribution, and  
826 energetics of the pelagic ecosystem in the Barents Sea: A synopsis. Polar  
827 Biol 14:405–411.
- 828 87. Defosse DL, Johnson RC, Paster BJ, Dewhirst FE, Fraser GJ, Haven W.  
829 1995. Spirochete Isolated from the Short-Tailed Shrew (*Blarina*  
830 *brevicauda*) and the White-Footed Mouse (*Peromyscus leucopus*). Int J  
831 Syst Bacteriol 45:78–84.
- 832 88. Gajardo K, Rodiles A, Kortner TM, Krogdahl Å, Bakke AM, Merrifield  
833 DL, Sørum H. 2016. A high-resolution map of the gut microbiota in  
834 Atlantic salmon (*Salmo salar*): A basis for comparative gut microbial  
835 research. Sci Rep 6:30893.
- 836 89. Loy A, Pfann C, Steinberger M, Hanson B, Herp S, Brugiroux S, Gomes  
837 C, Rattei T, Stecher B. 2017. Lifestyle and Horizontal Gene Transfer-  
838 Mediated Evolution of *Mucispirillum schaedleri*, a Core Member of the  
839 Murine Gut Microbiota 2:1–15.
- 840 90. Brinchmann MF, Rajan B, Fernandes JMO, Caipang CMA, Rombout  
841 JHWM, Kiron V. 2013. Atlantic cod (*Gadus morhua*) skin mucus proteins  
842 - Focus on lectins. Fish Shellfish Immunol 34:1641.
- 843 91. FAO\_Fisheries. 1982. Synopsis of the biological data on Dolphins-Fishes,  
844 *Coryphaena hippurus* Linnaeus and *Coryphaena equiselis* Linnaeus.
- 845 92. Hampson DJ, Ahmed N. 2009. Spirochaetes as intestinal pathogens:  
846 Lessons from a *Brachyspira* genome. Gut Pathog 3:1–3.
- 847 93. Westerman LJ, Boer RF De, Roelfsema JH, Friesema IHM, Kortbeek LM,  
848 Wagenaar JA, Bonten MJM. 2013. *Brachyspira* Species and  
849 Gastroenteritis in Humans. J Clin Microbiol 51:2411–2413.
- 850 94. Oxberry SL, Trott DJ, Hampson DJ. 1998. *Serpulina pilosicoli*, waterbirds  
851 and water: potential sources of infection for humans and other animals.  
852 Epidemiol Infect 121:219–225.
- 853 95. Thompson FL, Hoste B, Thompson CC, Goris J, Gomez-Gil B, Huys L,  
854 Vos P De, Swings J. 2002. *Enterovibrio norvegicus* gen. nov., sp. nov.,  
855 isolated from the gut of turbot (*Scophthalmus maximus*) larvae: a new  
856 member of the family *Vibrionaceae*. Int J Syst Evol Microbiol 52:2015–  
857 2022.
- 858 96. Thompson FL, Thompson CC, Naser S, Hoste B, Vandemeulebroecke K,  
859 Munn C, Bourne D, Swings J. 2005. *Photobacterium rosenbergii* sp. nov.  
860 and *Enterovibrio coralii* sp. nov., vibrios associated with coral bleaching.  
861 Int J Syst Evol Microbiol 55:913–917.
- 862 97. Pujalte MJ, Sitja-Bobadilla A, Alvarez-Pellitero P, Garay E. 2003.

- 863 Carriage of potentially fish-pathogenic bacteria in *Sparus aurata* cultured  
 864 in Mediterranean fish farms. *Dis Aquat Organ* 54:119–126.
- 865 98. Company R, Sitja-Bobadilla A, Pujalte MJ, Garay E, Alvarez-Pellitero P,  
 866 Perez-Sanchez J. 1999. Bacterial and parasitic pathogens in cultured  
 867 common dentex, *Dentex dentex* L. *J Fish Dis* 22:299–309.
- 868 99. Pascual J, Macia MC, Arahal DR, Garay E, Pujalte MJ. 2009. Description  
 869 of *Enterovibrio nigricans* sp. nov., reclassification of *Vibrio calviensis* as  
 870 *Enterovibrio calviensis* comb. nov. and emended description of the genus  
 871 *Enterovibrio* Thompson et al. 2002. *Int J Syst Evol Microbiol* 59:698–  
 872 704.
- 873 100. Org E, Parks BW, Joo JWJ, Emert B, Schwartzman W, Kang EY,  
 874 Mehrabian M, Pan C, Knight R, Gunsalus R, Drake TA, Eskin E, Lysis  
 875 AJ. 2015. Genetic and environmental control of host-gut microbiota  
 876 interactions. *Genome Res* 25:1558–1569.
- 877 101. Goodrich JK, Davenport ER, Waters JL, Clark AG, Ley RE. 2016. Cross-  
 878 species comparisons of host genetic associations with the microbiome.  
 879 *Science* (80- ) 352:532–535.
- 880 102. McFall-Ngai M. 2007. Care for the community. *Nature* 445:2007.

881

882

## 883 Tables

884

### 885 Table 1: Species collected and sample location.

886 The table lists the species, their Latin name, ecotype (for Atlantic cod), sampling  
 887 location, number of specimens (*n*), and the abbreviation used in the current  
 888 study.

889

| Species               | Latin name                  | Ecotype               | Sampling location | n  | Abbreviation |
|-----------------------|-----------------------------|-----------------------|-------------------|----|--------------|
| Atlantic cod          | <i>Gadus morhua</i>         | Northeast Arctic cod  | Lofoten           | 10 | NEAC         |
| Atlantic cod          | <i>Gadus morhua</i>         | Norwegian coastal cod | Lofoten           | 10 | NCC          |
| Atlantic cod          | <i>Gadus morhua</i>         | Norwegian coastal cod | Oslo fjord        | 2  | NCC_Oslo     |
| Poor cod              | <i>Trisopterus minutus</i>  |                       | Oslo fjord        | 5  | PC           |
| Norway pout           | <i>Trisopterus esmarkii</i> |                       | Oslo fjord        | 4  | NP           |
| Northern silvery pout | <i>Gadiculus thori</i>      |                       | Oslo fjord        | 3  | NSP          |

890

891

### 892 Table 2: Overview of individual metagenomic sequence data from gadoid

893 intestines. The table shows per sample the number of original reads, the

894 percentage of reads remaining after trimming and filtering, percentage of host  
 895 DNA, percentage of bacterial DNA and the final number of reads used in the  
 896 microbiome analysis. PhiX- and human-derived DNA sequences represent a  
 897 negligible proportion, and are excluded from the table. The bottom rows show  
 898 total or mean values per column. On average, 42.2% of the quality filtered reads  
 899 per sample are used for microbiome analysis. For details, see table S7.  
 900

| Sample    | Raw reads  | After quality<br>trimming/filtering (%) | Host DNA (%) | Bacterial DNA (%) | Final reads |
|-----------|------------|-----------------------------------------|--------------|-------------------|-------------|
| NCC_01    | 10 883 740 | 85.9                                    | 87.3         | 12.7              | 1 187 649   |
| NCC_02    | 11 140 950 | 87.9                                    | 62.2         | 37.8              | 3 699 538   |
| NCC_03    | 9 891 322  | 90.2                                    | 41.2         | 58.8              | 5 249 515   |
| NCC_04    | 10 587 865 | 86.9                                    | 85.2         | 14.8              | 1 364 663   |
| NCC_05    | 8 423 091  | 89.1                                    | 57.7         | 42.3              | 3 171 737   |
| NCC_06    | 10 879 319 | 89.6                                    | 30.5         | 69.5              | 6 772 948   |
| NCC_07    | 10 082 237 | 91.8                                    | 31.3         | 68.7              | 6 361 506   |
| NCC_08    | 9 114 703  | 87.3                                    | 80.5         | 19.5              | 1 549 210   |
| NCC_09    | 11 105 189 | 89.1                                    | 62.2         | 37.8              | 3 733 846   |
| NCC_10    | 11 140 743 | 84.7                                    | 86.0         | 14.0              | 1 320 875   |
| NEAC_01   | 13 120 072 | 89.7                                    | 53.6         | 46.4              | 5 463 098   |
| NEAC_02   | 12 119 926 | 89.6                                    | 56.8         | 43.2              | 4 687 565   |
| NEAC_03   | 11 981 093 | 89.2                                    | 54.4         | 45.6              | 4 869 722   |
| NEAC_04   | 12 618 529 | 91.1                                    | 33.5         | 66.5              | 7 646 256   |
| NEAC_05   | 12 154 047 | 87.6                                    | 74.2         | 25.8              | 2 747 042   |
| NEAC_06   | 13 883 762 | 88.4                                    | 59.5         | 40.5              | 4 971 507   |
| NEAC_07   | 12 149 049 | 89.1                                    | 56.9         | 43.1              | 4 666 533   |
| NEAC_08   | 11 861 852 | 88.7                                    | 64.0         | 36.0              | 3 787 155   |
| NEAC_09   | 11 131 413 | 85.7                                    | 75.1         | 24.9              | 2 378 591   |
| NEAC_10   | 15 483 018 | 83.7                                    | 82.9         | 17.1              | 2 221 214   |
| OO_cod_01 | 8 047 125  | 83.7                                    | 85.9         | 14.1              | 949 039     |
| IO_cod_01 | 9 716 392  | 90.2                                    | 43.7         | 56.3              | 4 937 260   |
| NP_01     | 15 621 734 | 84.7                                    | 51.6         | 48.4              | 6 400 120   |
| NP_02     | 16 548 297 | 90.2                                    | 18.1         | 81.9              | 12 224 903  |
| NP_03     | 16 608 312 | 78.3                                    | 72.6         | 27.4              | 3 568 206   |
| NP_04     | 13 459 929 | 83.0                                    | 61.5         | 38.5              | 4 300 178   |
| PC_01     | 10 743 586 | 87.7                                    | 30.5         | 69.5              | 6 550 868   |
| PC_02     | 18 982 339 | 81.0                                    | 29.6         | 70.4              | 10 833 201  |

|               |                    |             |             |             |                    |
|---------------|--------------------|-------------|-------------|-------------|--------------------|
| PC_03         | 9 420 298          | 84.1        | 54.9        | 45.1        | 3 568 861          |
| PC_04         | 9 623 591          | 87.7        | 30.0        | 70.0        | 5 908 283          |
| PC_05         | 19 630 680         | 77.7        | 55.0        | 45.0        | 6 861 474          |
| NSP_01        | 14 283 994         | 73.2        | 67.5        | 32.5        | 3 396 962          |
| NSP_02        | 14 527 770         | 76.3        | 63.8        | 36.2        | 4 008 926          |
| NSP_03        | 15 261 446         | 80.9        | 66.6        | 33.4        | 4 123 131          |
| <b>Total:</b> | <b>422 227 413</b> |             |             |             | <b>155 481 582</b> |
| <b>Mean:</b>  | <b>12 418 453</b>  | <b>86.0</b> | <b>57.8</b> | <b>42.2</b> |                    |

901

902

903 **Table 3: The 10 most abundant bacterial orders in the intestinal**  
 904 **microbiomes of gadoid species and ecotypes.** The table shows the mean  
 905 relative abundance (%) of the ten most abundant orders in each of the species or  
 906 ecotypes. *Vibrionales* is indicated in bold. The asterisk indicates that these  
 907 ecotypes belong to the same species (*Gadus morhua*)

908

| NEAC*                      | NCC*                       | PC                         | NP                         | NSP                         |
|----------------------------|----------------------------|----------------------------|----------------------------|-----------------------------|
| Bacteroidales (21.39)      | <b>Vibrionales (75.69)</b> | <b>Vibrionales (44.13)</b> | <b>Vibrionales (78.57)</b> | Brachyspirales (15.88)      |
| <b>Vibrionales (16.83)</b> | Alteromonadales (4.34)     | Clostridiales (11.16)      | Clostridiales (3.36)       | Clostridiales (14.14)       |
| Clostridiales (11.66)      | Clostridiales (3.47)       | Mycoplasmatales (8.92)     | Alteromonadales (2.11)     | Brevinematales (7.11)       |
| Brevinematales (7.43)      | Fusobacteriales (3.46)     | Alteromonadales (5.15)     | Enterobacterales (2.04)    | Deferribacterales (4.81)    |
| Bacillales (2.64)          | Oceanospirillales (1.56)   | Enterobacterales (2.97)    | Bacteroidales (1.02)       | Bacillales (4.44)           |
| Alteromonadales (2.61)     | Enterobacterales (1.19)    | Bacteroidales (2.09)       | Mycoplasmatales (0.87)     | Fusobacteriales (1.94)      |
| Flavobacteriales (2.17)    | Bacteroidales (0.92)       | Bacillales (1.81)          | Oceanospirillales (0.64)   | Desulfobivibrionales (1.70) |
| Fusobacteriales (1.62)     | Bacillales (0.60)          | Oceanospirillales (1.18)   | Burkholderiales (0.47)     | Lactobacillales (1.57)      |
| Brachyspirales (1.23)      | Pseudomonadales (0.33)     | Lactobacillales (0.95)     | Bacillales (0.43)          | Rhizobiales (1.40)          |
| Deferribacterales (1.23)   | Flavobacteriales (0.27)    | Burkholderiales (0.84)     | Pseudomonadales (0.43)     | Spirochaetales (1.28)       |

909

910

911 **Table 4: Effects of covariates on the intestinal microbial diversity (alpha**  
 912 **diversity) of gadoid species and ecotypes.** Results from the optimal linear  
 913 regression models used in testing for significant effects of covariates on within-  
 914 sample (alpha) diversity based on non-normalized, order-level sequence counts.  
 915 Population (species/ecotype) is the only covariate with a significant effect, and

916 estimates are given relative to NCC. Significant effects ( $p < 0.05$ ) are indicated  
 917 in bold.  
 918

|           | Shannon  |               | Simpson  |               | Inv. Simpson |               |
|-----------|----------|---------------|----------|---------------|--------------|---------------|
|           | Estimate | p-value       | Estimate | p-value       | Estimate     | p-value       |
| Intercept | 1.08     | <b>0.0000</b> | 0.38     | <b>0.0000</b> | 1.93         | <b>0.0001</b> |
| NEAC      | 1.69     | <b>0.0000</b> | 0.48     | <b>0.0000</b> | 5.62         | <b>0.0000</b> |
| NP        | 0.06     | 0.8367        | -0.01    | 0.8784        | -0.25        | 0.7476        |
| PC        | 1.18     | <b>0.0001</b> | 0.37     | <b>0.0002</b> | 2.44         | <b>0.0017</b> |
| NSP       | 2.36     | <b>0.0000</b> | 0.53     | <b>0.0000</b> | 10.03        | <b>0.0000</b> |

919  
 920

921 **Table 5: PERMANOVA analysis of intestinal microbial diversity from**  
 922 **gadoid species and ecotypes.** The table shows  $R^2$  values,  $p$ -values and adjusted  
 923  $p$ -values for pairwise comparisons of community composition (beta diversity)  
 924 between the different species or ecotypes using PERMANOVA. The tests are  
 925 based on Bray-Curtis dissimilarity calculated from order-level, normalized  
 926 sequence counts.  $p$ -values are adjusted for multiple testing by the Holm method.  
 927 Significant differences ( $p < 0.05$ ) are indicated in bold. Genus- and species-level  
 928 results are shown in Table S6.

929

| Populations     | $R^2$ | p.value       | p.adjusted    |
|-----------------|-------|---------------|---------------|
| NEAC vs. NCC    | 0.71  | <b>0.0001</b> | <b>0.0005</b> |
| NEAC vs. PC     | 0.53  | <b>0.0002</b> | <b>0.0018</b> |
| NEAC vs. NP     | 0.70  | <b>0.0010</b> | <b>0.0076</b> |
| NEAC vs.<br>NSP | 0.50  | <b>0.0041</b> | <b>0.0207</b> |
| NCC vs. PC      | 0.42  | <b>0.0026</b> | <b>0.0182</b> |

|             |      |               |               |
|-------------|------|---------------|---------------|
| NCC vs. NP  | 0.04 | 0.7138        | 0.7138        |
| NCC vs. NSP | 0.80 | <b>0.0035</b> | <b>0.0207</b> |
| PC vs. NP   | 0.53 | <b>0.0233</b> | 0.0740        |
| PC vs. NSP  | 0.80 | <b>0.0185</b> | 0.0740        |
| NP vs. NSP  | 0.94 | <b>0.0286</b> | 0.0740        |

930

931

## 932 **Figures**

933

### 934 **Figure 1: The intestinal microbiomes obtained from a range of gadoid** 935 **species and ecotypes**

936 (A) Map of sampling locations in Norway, Europe. Northeast Arctic cod  
937 (NEAC), and Norwegian coastal cod (NCC) were obtained from the Lofoten.  
938 NCC (two individuals), poor cod (PC), Norway pout (NP), and northern silvery  
939 pout (NSP) were obtained from the Oslo Fjord. (B) Non-metric  
940 multidimensional scaling (NMDS) plot of non-normalized, order-level sequence  
941 counts from the intestinal microbiomes of all samples. Each point represents an  
942 individual sample, and the species or ecotypes are indicated by different shapes  
943 and colors. The stress value of the NMDS plot is 0.14.

944

### 945 **Figure 2: Taxonomic composition of the fish intestinal microbiomes**

946 (A) Relative abundance of metagenomic shotgun sequences classified at the  
947 order level (93%). Colors represent the 28 orders with highest relative  
948 abundance, sequences assigned to other orders or viruses, and sequences  
949 classified above order level. Numbers along the x-axis indicate the individual  
950 samples of the different species/ecotypes. (B) Relative abundance of  
951 metagenomic shotgun sequences classified at the species level (66%). The plot  
952 includes the most highly abundant species, and other members of their parent  
953 bacterial genera (“other” categories) in the different fish species/ecotypes.

954 Numbers along the x-axis indicate the individual samples of the different  
955 species/ecotypes. The star denotes the *P. kishitanii* species reclassified from *P.*  
956 *phosphoreum*.

957

958 **Figure 3: Within-sample microbial diversity in the gadoid species and**  
959 **ecotypes**

960 Boxplots of Shannon (A) and Inverse Simpson (B) diversity in the fish  
961 species/ecotypes. Each individual is represented by a point, and the individuals  
962 are grouped and colored by species and ecotype. The middle band represents the  
963 median, while the upper and lower band shows the 75<sup>th</sup> and 25<sup>th</sup> percentile. The  
964 boxplots include the minimum and maximum alpha diversity values.

965

966 **Figure 4: SNV variation analysis of the most abundant bacterial genomes in**  
967 **the microbiomes of gadoid species**

968 For both of the genomes, the figure displays (A) read coverage per single  
969 nucleotide variant (SNV) position in each sample from the different  
970 species/ecotypes (mean coverage on right side of plot), (B) variation density  
971 (number of variable positions per 1000 kbp. reported in each individual sample,  
972 independent of coverage in the other samples) per sample (maximum value  
973 indicated). The y-axis of the coverage- and variation density plots are scaled  
974 across the genomes. (C) Heatmap of a randomly chosen subset of 400 SNVs. In  
975 the heatmap, each row represents a unique variable nucleotide position, where  
976 the color of each tile represents the two most frequent competing nucleotides in  
977 that position. The shade of each tile represents the square root-normalized ratio  
978 of the most frequent two bases at that position (i.e., the more variation in a  
979 nucleotide position, the less pale the tile is); see legend in the bottom of the  
980 figure. (D) Principal component analysis (PCA) plot of the SNV distribution  
981 (within-species variation) among the different samples. Each sample is  
982 represented by a dot, and colored according to species or ecotype membership.

983 Half-circles to the right of the legend indicate species or ecotypes with  
984 significantly different within-species variation (i.e. different strains). **(E)**  
985 Relative abundance of the different samples used in variation analysis. The bars  
986 are colored according to the SNV plot in (D).

# Figure 1

a)



b)



## Figure 2



# Figure 3

a)



b)



# Figure 4

## *Photobacterium kishitanii*



## PCA of SNV distribution



## Samples in SNV analysis



## *Photobacterium iliopiscarium*



## PCA of SNV distribution



## Samples in SNV analysis
